# Supplementary material for: Multi-level magnetic microrobot delivery strategy within a hierarchical vascularized organ-on-a-chip
Source: Royal Society of Chemistry journal article supplement (doi:10.1039/d3lc00770g), 2023-12-04
Supplement: d3lc00770g10.pdf [file d3lc00770g10.pdf]

## **Multi-level magnetic microrobots delivery strategy within a hierarchical vascularized organ-on-a-chip**

Kangyi Lu,<sup>a</sup> Chenyang Zhou,<sup>a</sup> Zhangjie Li,<sup>a</sup> Yijun Liu,<sup>a</sup> Feifan Wang,<sup>a</sup> Lian Xuan<sup>b</sup> and Xiaolin Wang<sup>\*a,b,c,d</sup>

<sup>a</sup> Department of Micro/Nano Electronics, School of Electronic Information and Electrical Engineering, Shanghai Jiao Tong University, Shanghai, 200240, China.

<sup>b</sup> Institute of Medical Robotics, Shanghai Jiao Tong University, Shanghai, 200240, China.

<sup>c</sup> National Key Laboratory of Advanced Micro and Nano Manufacture Technology, Shanghai Jiao Tong University, Shanghai, 200240, China.

<sup>d</sup> National Center for Translational Medicine (Shanghai) SHU Branch, Shanghai University, Shanghai, 200444, China.

### **Corresponding author:**

Xiaolin Wang

Email: xlwang83@sjtu.edu.cn; Tel: +86 (021) 3420-6683

**Supplemental Movie S1:** Demonstration of magnetic steering capability of the fabricated microrobotic guidewire in 3D space.

**Supplemental Movie S2:** Selective navigation of the microrobotic guidewire in a 2D coronary intervention simulator and a 3D vascular phantom.

**Supplemental Movie S3:** Superparamagnetic microrobots assemble from suspensions into swarms.

**Supplemental Movie S4:** Movement locus tracking of microrobot chain and swarm.

**Supplemental Movie S5:** Demonstration of the multi-level microrobot delivery within a two-tier branching microfluidic chip.

**Supplemental Movie S6:** Perfusion of fluorescent microbeads with a diameter of 5  $\mu\text{m}$  inside vessel lumens.

**Supplemental Movie S7:** Perfusion of 70 kDa FITC-dextran inside vessel lumens without non-physiological leakage.

**Supplemental Movie S8:** Magnetic navigation of microrobot swarms within EC-lined microfluidic channels and capillary lumens.

**Supplemental Movie S9:** Homogeneous behavior of microrobot swarms and their dissolution upon the removal of actuation field.

### Supplemental Figure S1:

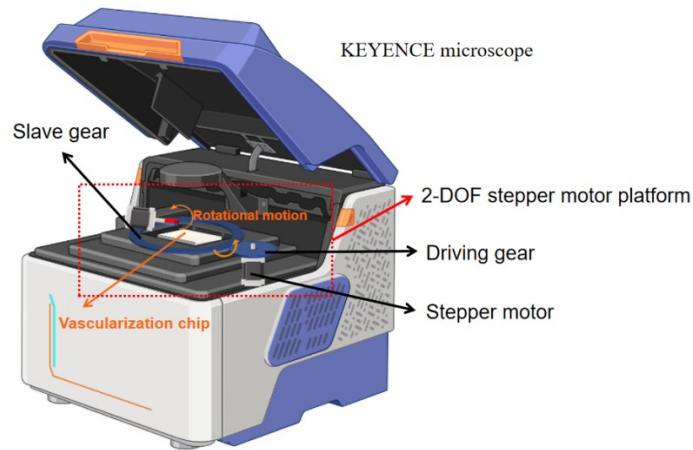

Fig. S1 Diagram of the magnetic control device setup. Magnetic navigation of the microrobotic guidewire is achieved through manipulating the position of the piezoelectric specimen stage of the KEYENCE microscope in the  $x$ - $y$  plane. The magnetic manipulation of microrobots was achieved by controlling both the direction and frequency of the rotating magnetic field through adjusting the position of the 2-DOF motor platform relative to the chip and modulating the rotational speed of the motor, respectively.

### Supplemental Figure S2:

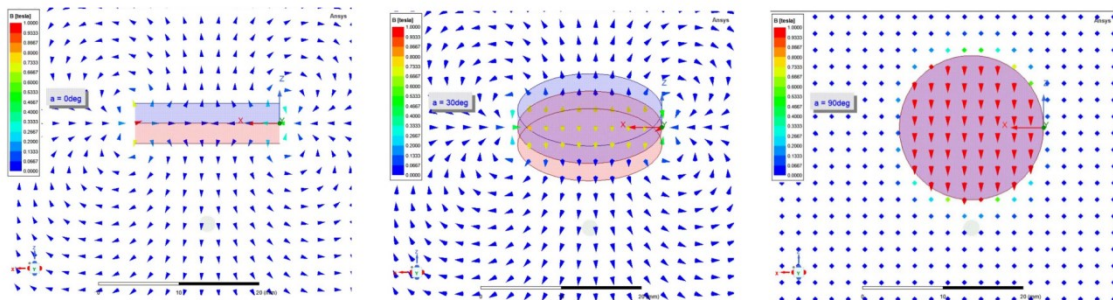

Fig. S2 Ansys simulation results of the magnetic field strength and directions within the workspace of the permanent magnet at 0°, 30°, and 90° degrees, respectively.

**Supplemental Table 1:** Parameters of the microrobotic guidewire used in simulation

| Notation (Description)               | Value | Unit    |
|--------------------------------------|-------|---------|
| $OD$ (Outer diameter)                | 700   | $\mu m$ |
| $ID$ (Inner diameter)                | 160   | $\mu m$ |
| $L$ (Length)                         | 20    | mm      |
| $E$ (Young's modulus)                | 1.367 | MPa     |
| $P_{PDMS}$ (Poisson ratio of PDMS)   | 0.49  |         |
| $P_{NdFeB}$ (Poisson ratio of NdFeB) | 0.24  |         |
| $M$ (Magnitude of magnetization)     | 128   | kA/m    |

**Supplemental Figure S3:**

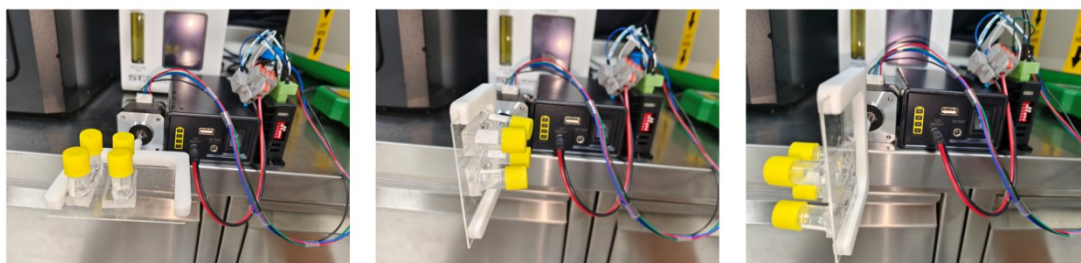

Fig. S3 A motorized rotational apparatus for EC-lining. The microfluidic device was subjected to a 90° rotation every 15 minutes for a duration of 4 hours, effectively facilitating the uniform adherence of ECs onto the channel surfaces.

**Supplemental Figure S4:**

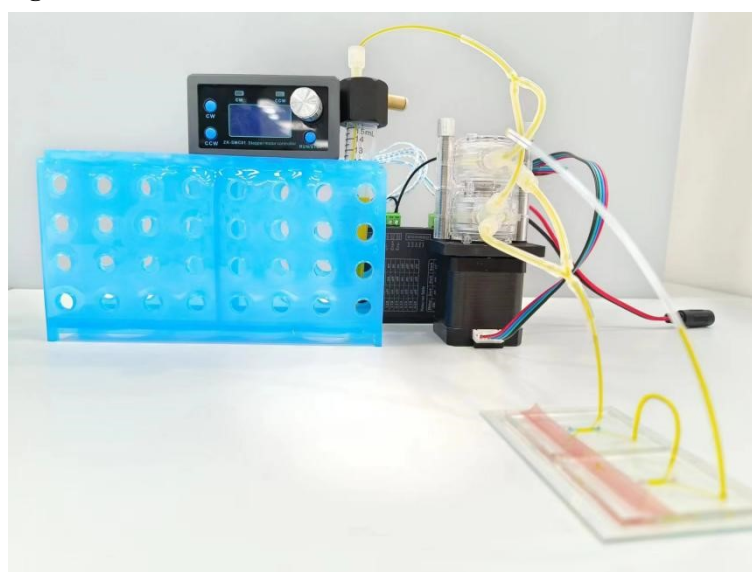

Fig. S4 The peristaltic pump device used for establishing a flow environment within a microfluidic chip.

**Supplemental Figure S5:**

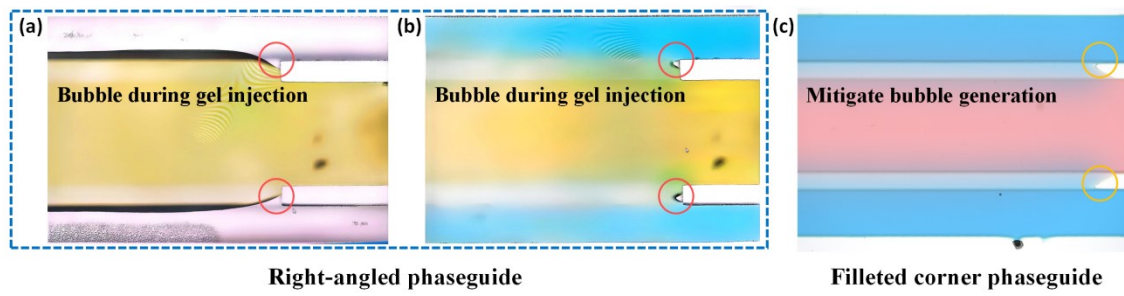

Fig. S5 Comparison of right-angled and filleted corner phaseguide design. (a)-(b) Right-angled phaseguide design: bubble formation during gel injection and media perfusion. (c) Filleted corner phaseguide design demonstrating effective reduction in bubble generation.

**Supplemental Figure S6:**

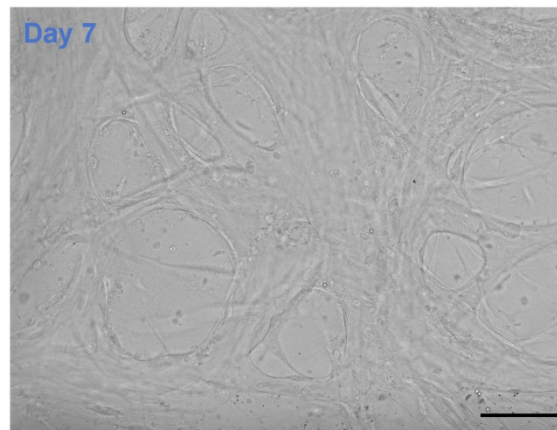

Fig. S6 High-magnification bright-field image displays blood lumens with distinct outlines. (Scale bar, 50  $\mu m$ ).
